1 **Visualization of SpoVAEa protein dynamics in dormant spores of**  
2 ***Bacillus cereus* and dynamic changes in their germinosomes and**  
3 **SpoVAEa during germination**

4 Yan Wang <sup>1</sup>, Norbert O. E. Vischer <sup>1</sup>, Demi Wekking <sup>1</sup>, Alessandra Boggian <sup>1</sup>, Peter Setlow <sup>2</sup>, and Stanley Brul <sup>1,\*</sup>

5 <sup>1</sup> Molecular Biology and Microbial Food Safety, Swammerdam Institute for Life Sciences, University of Amsterdam, Science  
6 Park 904, 1098 XH Amsterdam, The Netherlands; y.wang5@uva.nl (Y.W.); norbertvischer@gmail.com (N.O.E.V.);  
7 demi\_wekking@outlook.com (D.W.); boggian1alessandra@gmail.com (A.B.)

8 <sup>2</sup> Department of Molecular Biology and Biophysics, UConn Health, Farmington, CT 06030-3305, USA; setlow@nso2.uhc.edu

9 \* Correspondence: s.brul@uva.nl

10 **Abstract**

11 *Bacillus cereus* spores, like most *Bacillus* spores, can survive for years depending on their specific  
12 structure, and germinate when their surroundings become suitable. Spore germination proteins play  
13 an important role in the initiation of germination. Because germinated spores lose the extreme  
14 resistance of the dormant state, more information related to the function of germination proteins could  
15 be useful to develop new strategies to control *B. cereus* spores. Prior work has shown that: i) the  
16 channel protein SpoVAEa exhibits high frequency movement in the outer leaflet of the inner  
17 membrane (IM) in dormant spores of *B. subtilis*; ii) the dynamics of germinosome formation in  
18 developing spores of *B. cereus* indicate that the formation of germinosome foci is slower than foci  
19 formation of germinant receptor GerR and scaffold protein GerD. However, the dynamics of  
20 movement of SpoVAEa in *B. cereus* spores, and the complete behavior of the germinosome in  
21 germinated spores of *B. cereus* are still unclear. In this study, we found that the SpoVAEa fluorescent  
22 foci in dormant spores of *B. cereus* redistribute at a lower frequency than in *B. subtilis*, and likely  
23 colocalize with GerD in dormant spores. Our results further indicate that: i) overexpression of GerR(A-  
24 C-B)-SGFP2 and SpoVAEa-SGFP2 with GerD-mScarlet-I from a plasmid leads to more heterogeneity  
25 and lower efficiency of spore germination in *B. cereus*; ii), germinosome foci composed of GerR(A-C-  
26 B)-SGFP2 and GerD-mScarlet-I were lost prior to the phase transition in germination; and iii) GerD-  
27 mScarlet-I foci spread out but continued to exist beyond the phase transition of *B. cereus* spores.

28

29 **Keywords:** *Bacillus cereus*, spores, SpoVAEa, GerR, GerD, germination

30

31

## 32 Introduction

33 *Bacillus cereus* is a Gram-positive, rod-shaped, spore forming bacterium found in soil. The vegetative  
34 cells of *B. cereus* can form endospores under harsh environmental conditions, and spores are  
35 capable of surviving for years due to spore-specific features [1]. These specific properties also lead to  
36 major challenges to food safety once *B. cereus* contaminates foods, for example dairy products, rice,  
37 and chilled foods [2,3]. The major specific structural features of spores include the spore core  
38 containing chromosomal DNA, the inner membrane (IM) where germinant receptors (GRs) are located  
39 along with the germinosome scaffold protein GerD and channels for CaDPA, the germ cell wall with a  
40 thin peptidoglycan layer, the cortex with a thick peptidoglycan layer, the outer membrane, the  
41 proteinaceous coat, and finally the exosporium in some *Bacillus* species, including *B. cereus* [4].

42 Dormant spores can initiate germination and outgrow into vegetative cells when GRs sense nutrients  
43 in the environment, such as amino acids, inosine, and sugars. Additionally, previous work indicates  
44 that GerD acts as a scaffold protein in localizing GRs in the *B. subtilis* spore IM [5,6], and the *B.*  
45 *cereus* GerR GR has also been shown to interact with GerD in the dormant spore IM [7]. Another  
46 important group of spore germination proteins are the SpoVA proteins encoded by the *spoVA* operon  
47 which constitute a CaDPA channel in the IM of bacterial spores. The SpoVA proteins in spores of *B.*  
48 *subtilis* are SpoVAA, SpoVAB, SpoVAC, SpoVAD, SpoVAEb, SpoVAEa, and SpoVAF and are made  
49 only in developing spores [8]. The SpoVA proteins in spores of *B. cereus* are SpoVAA (BC\_4070),  
50 SpoVAB (BC\_4069), SpoVAC (BC\_4068), SpoVAD (BC\_4067), SpoVAEb (BC\_4066), SpoVAEa  
51 (BC\_4065) and SpoVAF (BC\_4064) encoded in one operon, and SpoVAC (BC\_5147), SpoVAD  
52 (BC\_5148), and SpoVAE (BC\_5149) in another operon. Previous work suggests that SpoVAEa of *B.*  
53 *subtilis* spores, a soluble protein on the outer surface of the spore IM, plays a role in the  
54 communication with the germinant binding GRs. It is thus possible that SpoVAEa of *B. subtilis* spores  
55 could stimulate the opening of the SpoVA channel, thereby allowing CaDPA release [9,10]. Recent  
56 work in our lab has shown that *B. subtilis* SpoVAEa fused to GFP and expressed on the chromosome  
57 in dormant spores exhibits random high frequency movement in the spore IM [11]. However, there is  
58 only a limited understanding of the location and physical state of SpoVAEa in dormant spores of the  
59 food pathogen *B. cereus*, nor whether SpoVAEa and GerD proteins colocalize at least transiently.

60 The spore germination process in Bacilli and Clostridia has been reviewed in the past years [12–14].  
61 Initially germinants bind to GRs, followed by large-scale release of monovalent cations and then  
62 CaDPA release mediated by the SpoVA proteins [15,16]. The kinetics and heterogeneity of spore  
63 germination triggered by L-alanine have been analyzed giving the frequency distribution at both the  
64 population level and in individual spores of *B. cereus* strain T using phase-contrast and fluorescence  
65 microscopy [17–19]. Previous work suggests that GerR(A-C-B) is localized in the spore IM using  
66 fluorescent reporter protein fusions and the membrane dye FM 4-64, and is primarily responsible for  
67 L-alanine germination of *B. cereus* spores [7,20,21]. Recent work also showed that in the IM  
68 germinosome, GerR(A-C-B) and GerD could be visualized using fluorescent reporter proteins and this  
69 work suggested that the formation of germinosome foci could be significantly slower than the

70 formation of GerR(A-C-B)-SGFP2 and GerD-mScarlet-I foci, with significant heterogeneity in  
71 formation of germinosomes foci [7]. However, little information is known about the overall changes or  
72 behavior of germination proteins during the germination process of *B. cereus* spores.

73 The strongly enhanced green fluorescent protein (SGFP2) and mScarlet-I have been successfully  
74 used in the visualization of spore germination proteins GerR(A-C-B) and GerD in spores of *B. cereus*  
75 ATCC 14579 using low-copy number plasmid expression vectors [7,20]. In this work, we aimed to  
76 visualize the movement of SpoVAEa with SGFP2 in dormant spores of *B. cereus* ATCC 14579 using  
77 fluorescence microscopy, and to analyze the fluorescence distribution by the changes, either up or  
78 down, in the full width at half maximum (FWHM) of the fluorescence. Additionally, the phase contrast  
79 intensity and fluorescence changes of germinosome foci formed by GerR(A-C-B)-SGFP2 and GerD-  
80 mScarlet-I, and SpoVAEa-SGFP2 and GerD-mScarlet-I were tracked by a time-lapse microscope  
81 equipped with phase-contrast and fluorescence analysis options. In the present study, we found that  
82 SpoVAEa-SGFP2 foci exhibited random movements in the IM, and likely colocalized with GerD-  
83 mScarlet-I in dormant spores of *B. cereus*. The results also suggested that expression of GerR(A-C-B)  
84 and SpoVAEa proteins with GerD affected germination efficiency and led to slower and more  
85 heterogeneous spore germination in *B. cereus*. Upon addition of germinant, germinosome FRET foci  
86 were lost and GerR(A-C-B)-SGFP2 as well as GerD-mScarlet-I germinosome foci decreased  
87 significantly in intensity. Yet some GerR(A-C-B)-SGFP2 foci and GerD-mScarlet-I foci continued to  
88 exist and apparently colocalize also after phase transition, suggesting that germinosome complexes  
89 may persist beyond the germination event. Finally, loss of SpoVAEa-SGFP2 foci occurred upon  
90 phase transition, while spread of GerD-mScarlet-I foci continued beyond phase-transition.

## 91 **Results**

### 92 **Movement of SpoVAEa foci in dormant spore of *B. cereus***

93 Previous studies showed that full width at half maximum (FWHM) can be used to quantitate  
94 fluorescence distribution of spore proteins [11]. In this study, we used dormant spores of *B. cereus*  
95 strain 014 expressing the fusion protein SpoVAEa-SGFP2 from a plasmid to observe the movement  
96 of SpoVAEa-SGFP2 foci. The percent changes of FWHM in 100 frames of an individual *B. cereus*  
97 spore during 5 sec was presented as up (positive percentage) or down (negative percentage)  
98 compared to the first frame. It was noted that there were different random movements in *B. cereus*  
99 spores 1, 2, 3 and 4 (Figure 1.A). The percent changes of FWHM in *B. subtilis* exhibited a wider  
100 boundary and higher frequency changes, either up or down, compared to *B. cereus* spore 2 (Figure  
101 1.B). This result suggested that the SpoVAEa-SGFP2 foci in spores of *B. cereus* and *B. subtilis* both  
102 moved, but behaved somewhat differently. In particular, SpoVAEa fluorescent foci of *B. subtilis*  
103 spores redistribute at a higher frequency than those of *B. cereus*. This difference may be caused by  
104 the fact that we look at different species with a different protein complement and with genomic  
105 expression in *B. subtilis* versus expression from a plasmid in *B. cereus*.

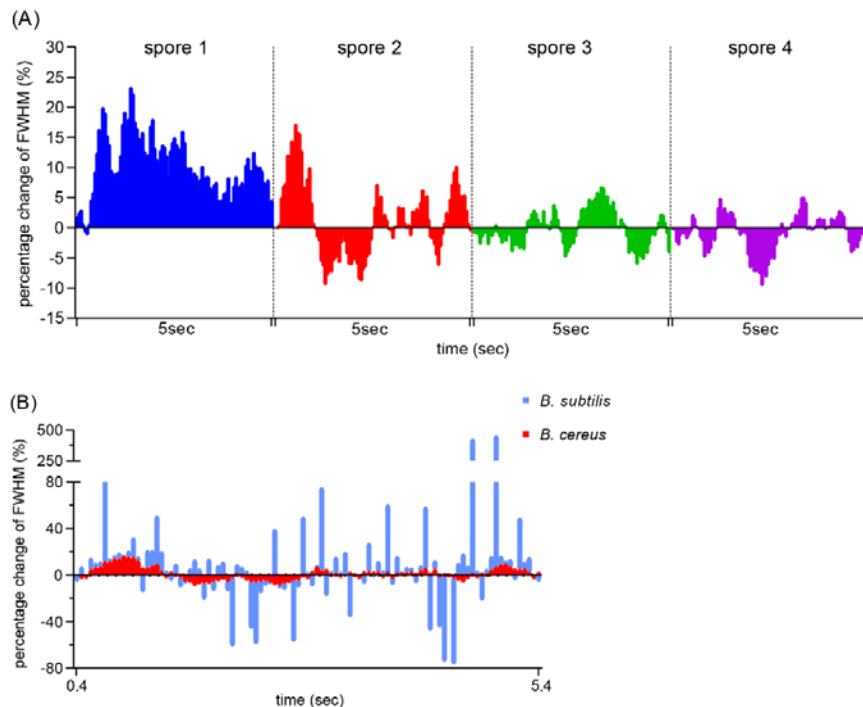

106

107 **Figure 1.** Comparison of the movement of SpoVAEa-SGFP2 foci in dormant spores of *B. cereus* and *B. subtilis*.  
108 Panel A, the percent changes of FWHM in individual spores 1, 2, 3 and 4 of *B. cereus*. Panel B, the percent  
109 changes of FWHM in a *B. cereus* spore 2 (red square) and a *B. subtilis* spore (blue square). The positive and  
110 negative percentages of columns indicate the up and down of the tendency of fluorescence FWHM distribution.

## 111 **SpoVAEa-SGFP2 levels are enhanced by GerD expression in recombinant *B. cereus*** 112 **spores**

113 Our recent work showed that GerR(A-C-B) and GerD foci are present and colocalized in dormant  
114 spores of *B. cereus* [20]. The fusion protein SpoVAEa-SGFP2 was expressed alone in spores of *B.*  
115 *cereus* strain 014, and expressed together with GerD-mScarlet-I in spores of strain 015 in this work.  
116 The fluorescence intensity of SGFP2 in strains 014 and 015 are as expected both higher than those  
117 of wild type *B. cereus* cells without recombinant protein. However, it is notable that the fluorescence in  
118 *B. cereus* strain 015 looks brighter than in strain 014 (Figure 2.A). When the fluorescence level in the  
119 spores of recombinant strains 014 and 015 were compared, 53% of the 014 spores and 43% of the  
120 015 spores gave a 2~3 fold higher fluorescence levels compared to the wild type. Furthermore, levels  
121 of recombinant spores with 3-fold higher fluorescence level than wild type spores were higher in strain  
122 015 spores than 014 spores (Figure 2.B). These results indicate that SpoVAEa-SGFP2 can be  
123 successfully expressed from a plasmid in two recombinant *B. cereus* strains 014 and 015 and leads to  
124 1 to 6 fold higher fluorescence levels than the wild-type in the SGFP2 channel. Moreover, when  
125 SpoVAEa-SGFP2 and GerD-mScarlet-I are expressed from the same plasmid, GerD possibly  
126 contributes to the stability of SpoVAEa, or possibly enhances the expression of SpoVAEa.

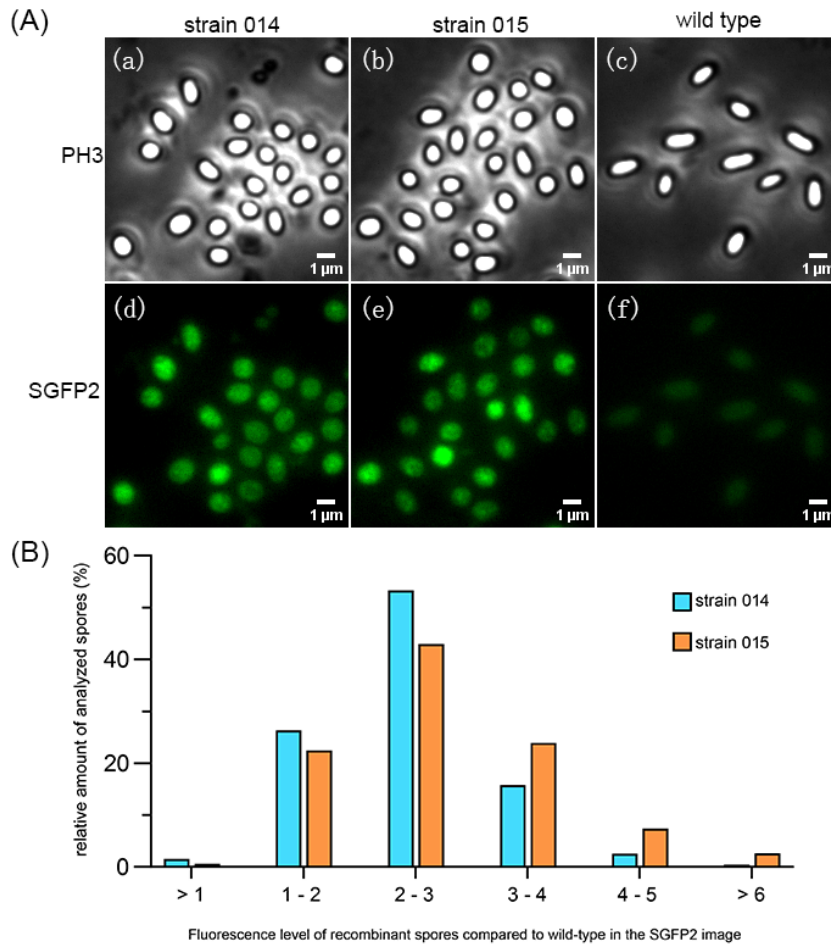

127

128 **Figure 2.** Visualization and comparison of SpoVAEa-SGFP2 fusion protein fluorescence in dormant spores of *B.*  
129 *cereus* strains 014 and 015. Panel A, dormant spores of *B. cereus* strains 014, 015 and wild type were visualized:  
130 (a), (b), and (c) in the PH3 channel, or (d), (e), and (f) in the SGFP2 fluorescence channel. PH3, phase contrast.  
131 Panel B, fluorescence level in the SGFP2 channel in spores of strains 014 and 015 compared to wild type. The  
132 number of analyzed spores of *B. cereus* strain 014, 015 and wild type were 1564, 2901, and 916, respectively.

### 133 Colocalization analysis between SpoVAEa and GerD proteins

134 The next aim was to study the possible interaction of SpoVAEa-SGFP2 and GerD-mScarlet-I in  
135 dormant spores of *B. cereus*. The spectrum of SGFP2 and mScarlet-I have an overlapping region,  
136 that may produce a larger Pearson's coefficient, which is a commonly used colocalization indicator,  
137 [7,22,23]. To reduce any effects of GerD-mScarlet-I itself, spores of *B. cereus* strain 007 expressing  
138 GerD-mScarlet-I was used as a control. The analysis (Fig. 3) showed that the Pearson's coefficient of  
139 channels SGFP2 and mScarlet-I in spores of *B. cereus* strain 015 was significantly higher than those  
140 in the control. This result indicated that there is likely colocalization between the SpoVAEa-SGFP2  
141 and GerD-mScarlet-I proteins in *B. cereus* spores.

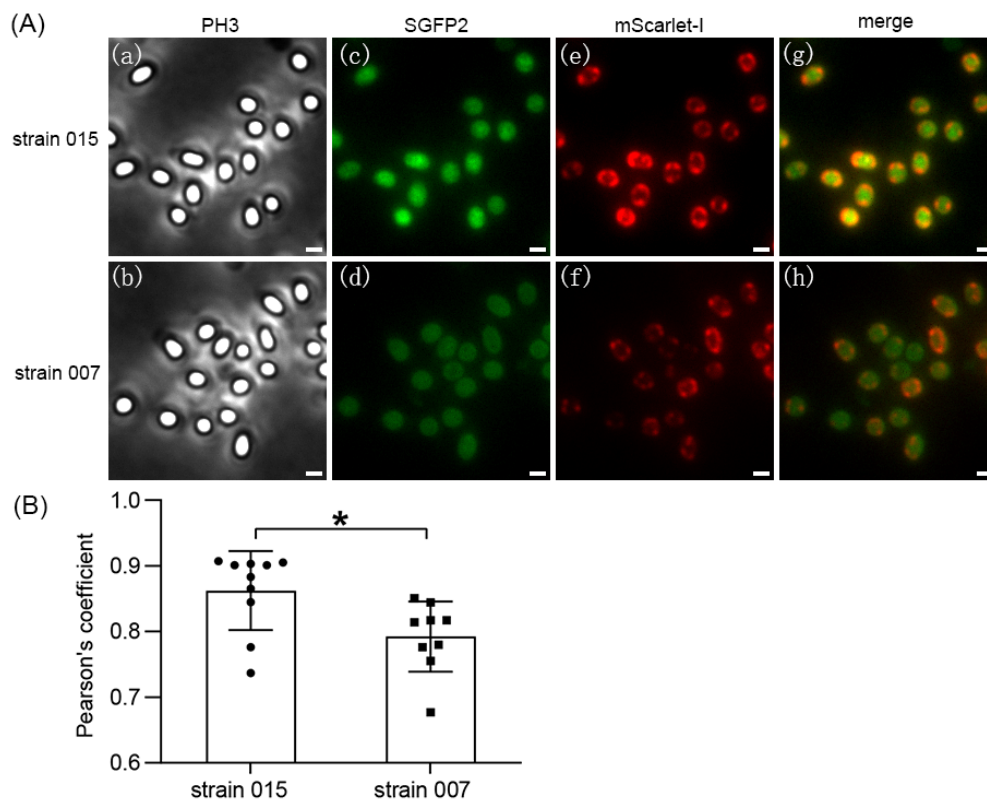

142

143 **Figure 3.** Co-localization analysis between SpoVAEa and GerD proteins in dormant spores of *B. cereus* strain  
144 015. Panel A, visualization of *B. cereus* strain 015 and 007 spores: (a) and (b) Phase-contrast channel (PH3); (c)  
145 and (d), SGFP2 channel; (e) and (f), mScarlet-I channel; (g) and (h), merged image of SGFP2 and mScarlet-I  
146 channels. The scale bar is 1  $\mu$ m. Panel B, Pearson's coefficient between SGFP2 and mScarlet-I channels. Data  
147 are shown as a mean with SD. \*,  $P < 0.05$ .

### 148 **Overexpression of GerR and SpoVAEa with GerD affects *B. cereus* spore germination**

149 Our recent work suggested that there is a significant kinetic heterogeneity in the formation of a  
150 germinosome in developing spores of *B. cereus* [7]. In this study, the initiation time of germination  
151 (named germX) is presented as the difference in spores of strain 006 expressing GerR(A-C-B)-  
152 SGFP2 and strain 014 expressing SpoVAEa-SGFP2 compared to wild type. When GerR(A-C-B)-  
153 SGFP2 and SpoVAEa-SGFP2 with GerD-mScarlet-I expressed from plasmid in *B. cereus* strains F06  
154 and 015 respectively, germX exhibited greater heterogeneity than spores of *B. cereus* strains 006 and  
155 014 (Figure 4). In particular, spores of *B. cereus* strain 007 expressing GerD-mScarlet-I alone from  
156 plasmid exhibited a very different germX of individual spores (Figure 4). Our result indicated that  
157 overexpression of GerD-mScarlet-I from plasmid in *B. cereus* led to more heterogeneity of spore  
158 germination.

159 Previous work has shown that expression of the GerA GR controlled by the strong forespore-specific  
160 *sspB* promoter in the *B. subtilis* genome can significantly increase the rate of germination triggered by  
161 L-alanine [24]. Our results showed that spores of all different *B. cereus* strains started to germinate by

162 1, 10 and >20 min, namely groups germX\_1, germX\_10, and germX\_>20. Most spores were in group  
163 germX\_1, with 81.2%, 82.9%, 48.5%, 97.7%, 74.7%, and 99.8% of spores of *B. cereus* strains F06,  
164 006, 015, 014, 007 and wild type, respectively (Figure 5). Overexpression of GerR(A-C-B) with or  
165 without GerD in strains F06 and 006 led to significantly lower germination efficiency compared to wild  
166 type spores, with effects in F06 spores slightly greater than in 006 spores. The results also showed  
167 that overexpression of SpoVAEa alone in spores of strain 014 had no effect on germination efficiency  
168 compared to wild type. However, expression of SpoVAEa with GerD in spores of *B. cereus* strain 015  
169 significantly ( $P < 0.0001$ ) slowed germination compared to wild type spores (Figure 5). Importantly,  
170 whether GerD was expressed alone from a plasmid in *B. cereus* strain 007 or along with GerR in  
171 strain F06 or SpoVAEa in strain 015, the overexpression of GerD led to a significantly lower  
172 germination efficiency compared to wild type spores (Figure 5). Overall, our results indicate that  
173 overexpression of the GerR GR and SpoVAEa with GerD from plasmids affects the germination  
174 efficiency of *B. cereus* spores.

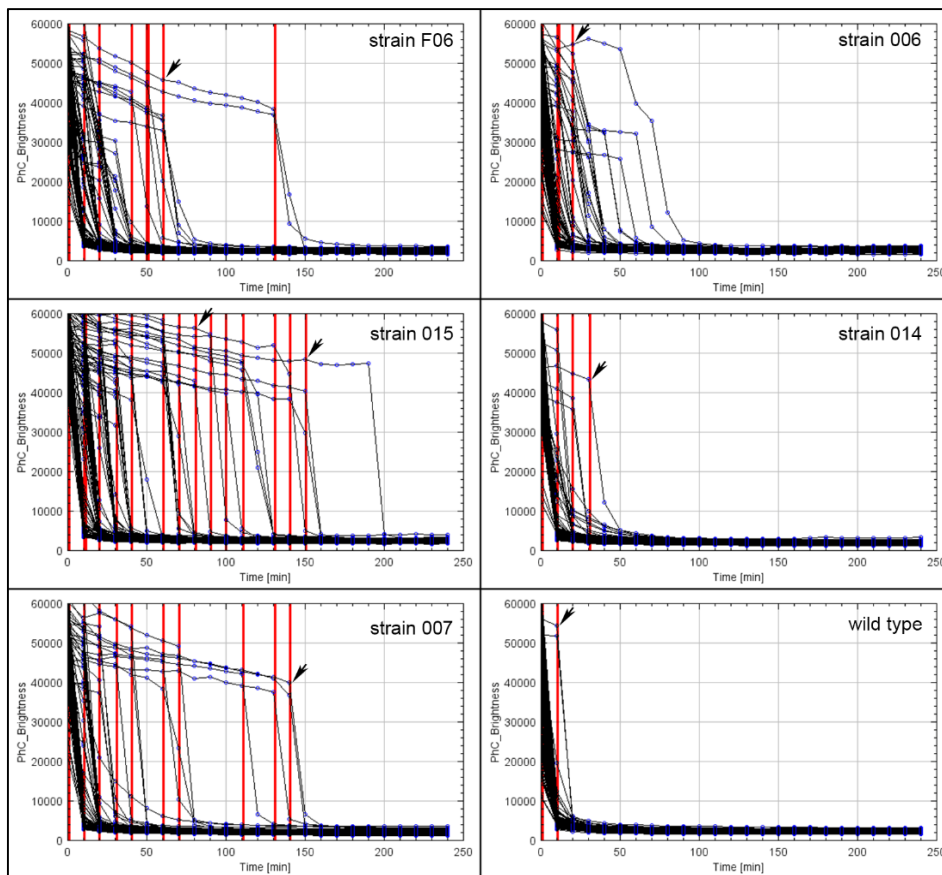

175

176 **Figure 4.** The phase plots show the germinated spores of *B. cereus* strains F06, 006, 015, 014, 007 and wild  
177 type. The red lines and black arrows indicate the initiation time of spore germination, termed germX. Each black  
178 line indicates the change of phase-contrast intensity in an individual spore during germination. The numbers of  
179 analyzed spores of *B. cereus* strains F06, 006, 015, 014, 007 and wild type were 108, 92, 122, 233, 107 and 265,  
180 respectively.

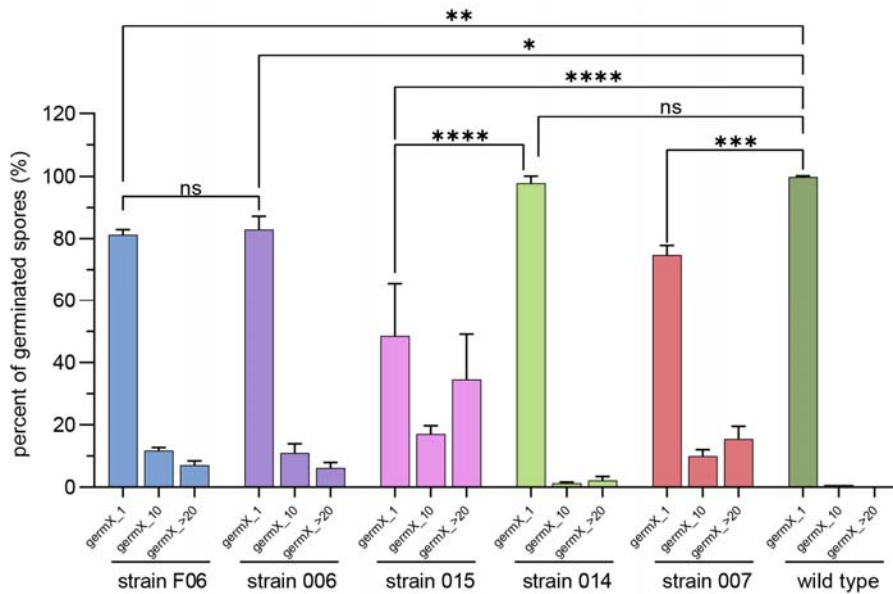

181

182 **Figure 5.** Germination of spores of *B. cereus* strains F06, 006, 015, 014, 007 and wild type were analyzed based  
183 on the different germX times: germX\_1, initiation time of germination at  $\leq 1$  min; germX\_10, initiation time of  
184 germination at  $< 10$  min; germX\_>20, initiation time of germination more than 20 min. Data are shown as the  
185 mean with SD and are averages of three independent experiments. The numbers of analyzed germinated spores  
186 of different *B. cereus* strains are listed in Table S2. ns, not significant; \*,  $P < 0.05$ ; \*\*,  $P < 0.01$ ; \*\*\*,  $P < 0.001$ ; \*\*\*\*,  
187  $P < 0.0001$ .

### 188 **Dynamics of germinosome behavior upon germination triggered by L-alanine in *B.*** 189 ***cereus* spores**

190 Our recent study suggested that the formation of FRET foci of GerR(A-C-B)-SGFP2 and GerD-  
191 mScarlet-I could be significantly slower than the foci in SGFP2 and mScarlet-I channels in *B. cereus*  
192 spores [7]. In this work, we aimed to track the dynamic changes of germinosome FRET foci upon  
193 germination triggered by L-alanine in spores of *B. cereus* strain F06 expressing GerR(A-C-B)-SGFP2  
194 and GerD-mScarlet-I fusion proteins from a plasmid. The phase-contrast channel (PH3) recorded the  
195 transition between a phase-bright individual spore to a phase-dark spore at 1 min and 10 min of the  
196 germination time in groups germX\_1 and germX\_10, respectively (Figure 6.A, Table S3). Upon the  
197 phase transition in the germX\_1 group, the intensity of germinosome FRET foci at 10 min was  
198 significantly lower than at the beginning (0 min), as well as that of GerR(A-C-B)-SGFP2 and GerD-  
199 mScarlet-I foci (Figure 6.B, Table S3). In addition, the intensity of the FRET foci of germX\_10 spores  
200 at 30 min was significantly lower compared to 20 min, that is, the intensity drop occurred always after  
201 phase transition (Figure 6.B, Table S3). In addition, any remaining GerD-mScarlet-I foci became  
202 diffuse in germinated spores of groups germX\_1 and germX\_10 (Figure 6.B). These results indicate  
203 that the germinosome FRET foci in spores of *B. cereus* were largely lost shortly after the phase  
204 transition. Some GerR(A-C-B)-SGFP2 foci and GerD-mScarlet-I foci continued to exist and apparently  
205 colocalize also after phase transition, suggesting that germinosome complexes may persist beyond  
206 the germination event.



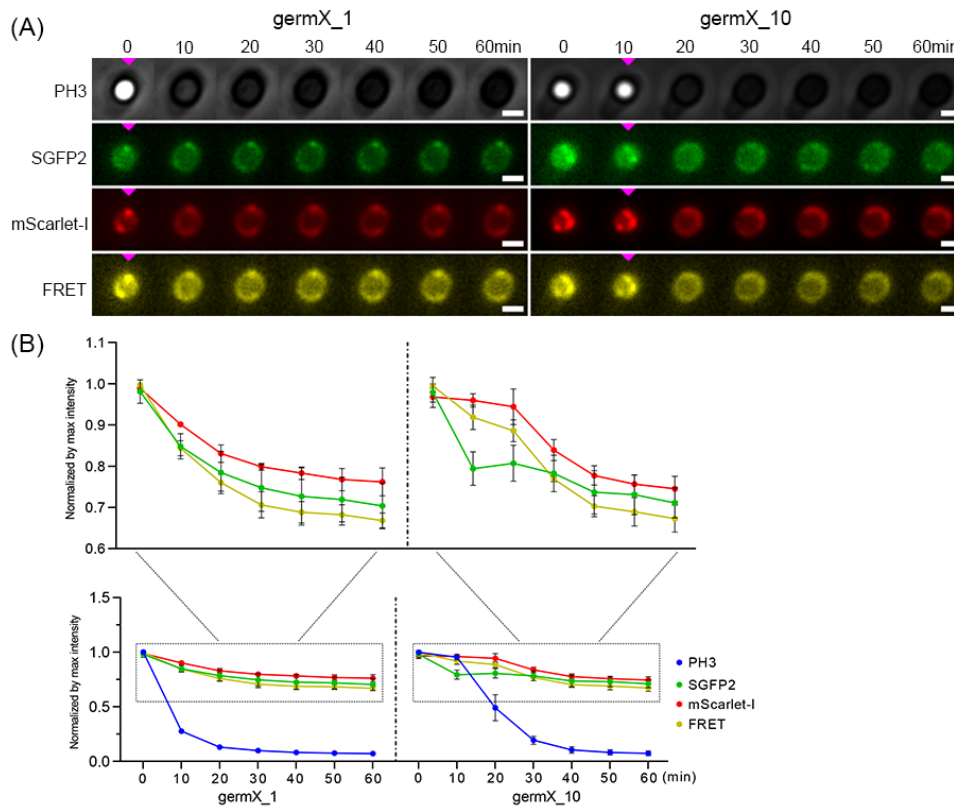

207

208 **Figure 6.** Dynamic changes in germinosome foci upon germination of *B. cereus* strain F06 spores. Panel A,  
 209 visualization of the changes in GerR-SGFP2, GerD-mScarlet-I and germinosome foci at 10 min intervals over 60  
 210 min. The left column is PH3, SGFP2, mScarlet-I and FRET channels of group germX\_1. The right column is PH3,  
 211 SGFP2, mScarlet-I and FRET channels of the germX\_10 group. PH3, phase-contrast. The pink triangles indicate  
 212 the initiation of germination. The scale bar is 1  $\mu$ m. Panel B, the line charts of PH3, SGFP2, mScarlet-I and FRET  
 213 channels. Left column, germX\_1 group; right column, germX\_10 group. Data are shown as the mean with SD  
 214 and are averages of three independent experiments. The number of analyzed germinated spores of *B. cereus*  
 215 strains F06 is listed in Table S2. The statistical analysis of the later time points in line charts in comparison to the  
 216 previous one are listed in Table S3.

### 217 **Dynamics of SpoVAEa and GerD proteins during germination of *B. cereus* spores** 218 **triggered by L-alanine**

219 In this work, recombinant spores of *B. cereus* strain 015 expressing SpoVAEa-SGFP2 and GerD-  
 220 mScarlet-I fusion proteins from a plasmid were used to visualize the dynamic changes of SpoVAEa  
 221 and GerD upon germination initiated by L-alanine. The results showed that the phase-contrast  
 222 intensity of germinated spores at 10 min in group germX\_1 was very greatly decreased compared to  
 223 that of phase-bright spores at 0 min. In the group germX\_10, the phase transition occurred and the  
 224 phase-contrast intensity of phase-dark germinated spores at 20 min was greatly decreased compared  
 225 to that at 10 min (Figure 7, Table S4). The fluorescence intensity in the SGFP2 or mScarlet-I channel  
 226 of germinated spores at 10 min in group germX\_1 was decreased compared to that of phase-bright  
 227 spores at 0 min, but this reduction was not significant ( $P > 0.05$ ). The results showed that the

228 SpoVAEa-SGFP2 foci were lost, and overall spore green fluorescence intensity dropped upon  
229 initiation of germination. The same is true for GerD-mScarlet-I, although, in accordance with our  
230 results described in Figure 6, some foci continued to exist beyond the phase transition albeit at less  
231 fluorescent intensity.

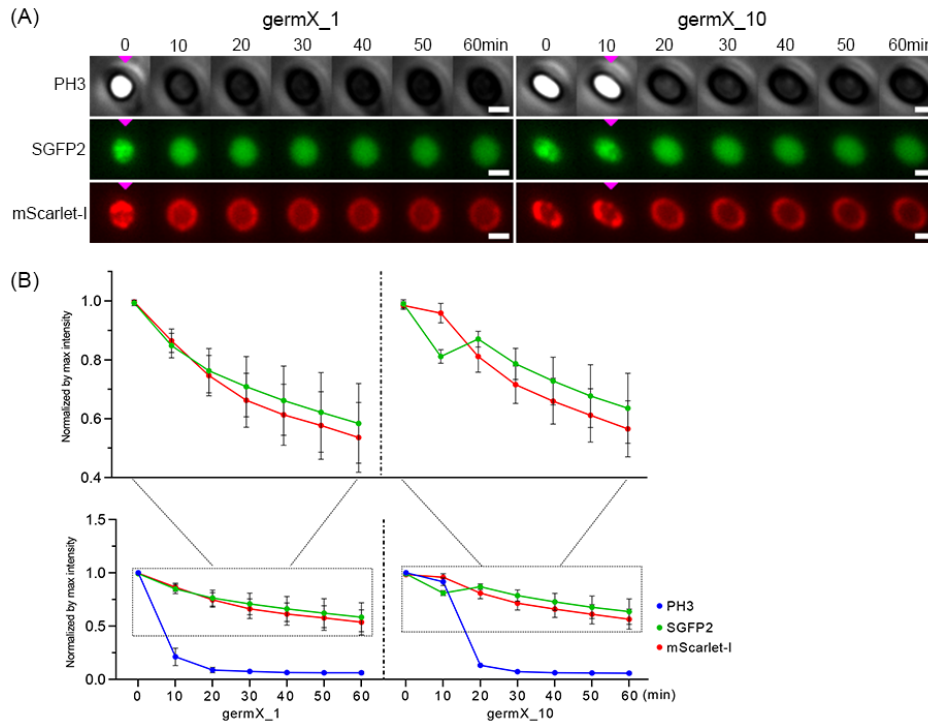

233

234 **Figure 7.** Dynamic changes in SpoVAEa-SGFP2 and GerD-mScarlet-I during germination of *B. cereus* strain 015  
235 spores. Panel A, visualization of changes in SpoVAEa-SGFP2 and GerD-mScarlet-I at 10 min intervals over 60  
236 min. The left column is PH3, SGFP2 and mScarlet-I channels of group germX\_1. The right column is PH3,  
237 SGFP2 and mScarlet-I channels of the germX\_10 group. PH3, phase-contrast. The pink triangles indicate the  
238 initiation of germination. The scale bar is 1 μm. Panel B, the line charts of PH3, SGFP2 and mScarlet-I channels.  
239 Left column, germX\_1 group; right column, germX\_10 group. Data are shown as the mean with SD and represent  
240 three independent experiments. The numbers of analyzed germinated spore of *B. cereus* strains 015 are listed in  
241 Table S2. The statistical analysis of the latter time points in line charts in comparison to the previous one is listed  
242 in Table S4.

## 243 Discussion

244 *B. cereus* spores, like most *Bacillus* spores, have various resistance characteristics due to spore  
245 specific structures, and can restart metabolism only after spore germination has been completed. The  
246 nutrient germination of spores is initiated by germinant binding to specific GRs localized in spore's IM,  
247 including GerR, GerK, GerG, GerL, GerQ, GerI, and GerS in spores of *B. cereus*, with GerR triggering  
248 germination with L-alanine [21,25]. In addition, SpoVAEa is an IM component of the SpoVA protein  
249 CaDPA channel and GerD is a scaffold protein playing an important role in germinosome formation  
250 and thus spore germination in *B. subtilis* and *B. cereus* [6,7,9]. To extend these latter observations,

251 we have now studied the dynamic changes of SpoVAEa protein in dormant and germinated spores of  
252 *B. cereus*, and the kinetic changes in germinosome foci during the germination process.

253 Based on previous observations, the expression level of GerD and SpoVA proteins in *B. subtilis*  
254 spores are  $\sim 10^2$ -fold and  $10^3$ -fold higher than those of GRs [26]. Fluorescence microscopy of *B.*  
255 *cereus* spores showed clear foci of GerD-mScarlet-I and indistinct foci of SpoVAEa-SGFP2, indicating  
256 that a possible reason could be the different level of the two proteins. However, the weaker  
257 fluorescent signal of SpoVAEa-SGFP2 than that of GerD-mScarlet-I in our work might be caused by  
258 expression of only one subunit of the SpoVA complex, or perhaps SpoVAEa has a lower expression  
259 level than other SpoVA proteins [9].

260 In this study, recombinant *B. cereus* spores overexpressing GerR(A-C-B) and SpoVAEa with and  
261 without GerD from a plasmid were used to assess the effects of these proteins on germination  
262 triggered by L-alanine. Spores expressing GerR(A-C-B) with GerD in group germX\_1 exhibited two  
263 significant reductions in germination, 0 min versus 10 min and 10 min versus 20 min in the phase-  
264 contrast channel, but there was only one significant reduction 0 min versus 10 min with spores  
265 expressing GerR(A-C-B) alone (Figure S1, Table S3, Table S5); note similar results found in group  
266 germX\_10. However, spores overexpressing SpoVAEa with and without GerD both presented only  
267 one significant reduction in the phase-contrast channel in groups germX\_1 and germX\_10 (Figure S1,  
268 Table S4, Table S5). These results indicated that overexpression of GerD has an inhibitory effect on  
269 spore germination heterogeneity and efficiency, and note that the heterogeneity of spore germination  
270 is consistent with previous work [17,19]. Considering initiation of spore nutrient germination, a recent  
271 study suggested that in *B. subtilis*, GerAB is responsible for sensing L-alanine, indicating that the  
272 function of GerA's B subunit is to detect nutrient germinants [27]. Our recent studies also suggest that  
273 there is interaction of GerRB with GerD and with a GR B subunit possibly bound by L-alanine [7,28].  
274 Finally, the possible reason for this inhibitory effect can be that GerD might occupy the limited binding  
275 site or position on the surface of GerRB when spore germination is triggered by L-alanine.

276 Our recent results using FRET-based analysis indicate that there is interaction between GerR(A-C-B)-  
277 SGFP2 and GerD-mScarlet-I, moreover, the dynamics of germinosome formation suggest that the  
278 formation of foci in the FRET channel could be significantly slower than formation of the GerR(A-C-B)-  
279 SGFP2 and GerD-mScarlet-I foci. To further assess this interaction, we observed the changes of  
280 germinosome foci upon germination initiated by L-alanine in *B. cereus* spores. In this experiment, the  
281 protein FRET pairs, GerR(A-C-B)-SGFP2 and GerD-mScarlet-I, were expressed from a plasmid and  
282 driven by their native promoters during sporulation. Possibly consistent with the role of the B subunit  
283 of GerA in *B. subtilis*, GerRB may also be responsible for initiating germination with L-alanine in *B.*  
284 *cereus* (Figure 6). Once the process of spore germination was initiated, our results showed that some  
285 GerD SpoVAEa colocalization likely occurs and germinosome FRET positive foci were lost upon  
286 phase transition while some germinosome complexes may continue to exist beyond this time point.  
287 Figure 8 shows a hypothetical sequence of events that may occur during spore germination. A note of  
288 caution is warranted because the germination proteins were overexpressed from a plasmid and

289 evidently may disrupt the dynamic balance in germination protein assembly in sporulation and  
290 germination. Importantly though, all germination proteins studied were expressed from the plasmid  
291 under the control of their respective native promoters allowing relative expression differences to be  
292 conserved.

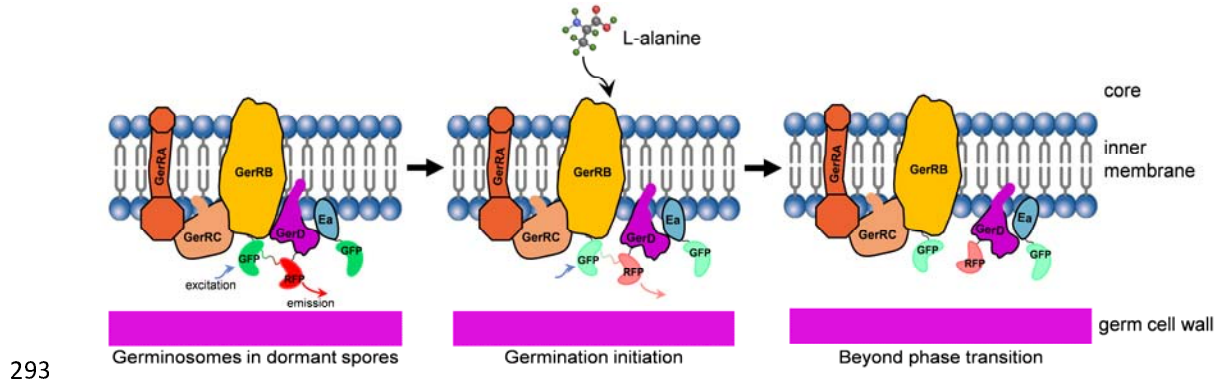

293

294 **Figure 8.** The proposed model of germinosome dynamics during germination triggered by L-alanine in *B. cereus*  
295 spores. The left most panel: i) FRET positive germinosome formation due to FRET interaction between GerR(A-  
296 C-B)-SGFP2 and GerD-mScarlet-I; the darker green-red line between GFP (deep green) and RFP (deep red)  
297 indicates the energy transfer path in the FRET event between GerR(A-C-B) and GerD; ii) likely colocalization  
298 between SpoVAEa and GerD proteins, albeit transient; GFP - SGFP2; RFP - mScarlet-I; Ea - SpoVAEa. The  
299 middle panel: i) FRET positive germinosomes are largely lost upon the phase transition in germination  
300 initiation caused by L-alanine; the FRET signal (light green-red line) between GFP (light green) and RFP (light red)  
301 has become weak, indicating that FRET events between GerR(A-C-B) and GerD have been gradually lost, consistent  
302 with GerD and GerRB-GFP moving apart; ii) the SpoVAEa-SGFP2 and GerD-mScarlet-I fluorescence intensities  
303 have decreased upon initiation of germination. The right most panel: i) there are no longer any FRET positive  
304 germinosomes, but some GerR(A-C-B)-SGFP2 foci (light green) and GerD-mScarlet-I foci (light red) continue to  
305 exist, indicating colocalization of GerR(A-C-B) and GerD after the phase transition; ii) some GerD foci also  
306 continue to exist and likely colocalize, perhaps transiently with SpoVAEa.

307 In summary, the SpoVAEa-SGFP2 protein exhibits random movement on the outer surface of spores'  
308 IM and a likely transient co-localization with GerD-mScarlet-I in dormant spores of *B. cereus*. Studying  
309 spore germination in phase-contrast microscopy suggested that overexpression of GerR(A-C-B)-  
310 SGFP2 and SpoVAEa-SGFP2 with GerD-mScarlet-I from a plasmid leads to more heterogeneity and  
311 lower efficiency of spore germination in *B. cereus* pointing to the need for future studies to investigate  
312 the stoichiometry of the germinosome components in *B. cereus* in more detail. The dynamics of  
313 germination showed that germinosome foci composed of GerR(A-C-B)-SGFP2 and GerD-mScarlet-I  
314 were lost soon after the phase transition. Further work related to the machinery of spore germination,  
315 should likely focus on detailed interaction studies between the SpoVA channel and GerD, or the  
316 SpoVA channel and other GRs using site-directed mutagenesis guided by molecular dynamics protein  
317 modelling.

## 318 **Materials and Methods**

## 319 **Recombinant plasmids and *B. cereus* strains**

320 The recombinant plasmids and *B. cereus* strains used in this study are listed in Table 1. All primers  
321 used are listed in Table S1. The recombinant plasmids were constructed as described in our previous  
322 studies [7,20]. Briefly, the region of 226 bp located in the upstream region of the *spoVA* operon was  
323 considered as the promoter region of gene *spoVAEa* and named PEa. The PEa fragment was  
324 inserted into pHT315 between *Kpn* I and *Xba* I sites resulting in plasmid pHT315-PEa. Next, the  
325 *spoVAEa* (BC\_4065) gene was amplified from genomic DNA of *B. cereus* ATCC 14579 (GenBank:  
326 AE016877) using a pair of primers, 315\_YW-42 and 315\_YW-43. The *SGFP2* gene with stop codons  
327 was fused to the 3' end of the *spoVAEa* gene using a two-fusion PCR. The fusion product was  
328 inserted into pHT315-PEa between *Xba* I and *Hind* III sites. The resulted ligation product was  
329 transformed into competent *E. coli* cells and selection of positive clones giving plasmid pHT315-f14.  
330 The fusion fragment PD-*gerD-mScarlet-I* was amplified from plasmid pHT315-f05 and inserted into  
331 pHT315-f14 between *Kpn* I and *EcoR* I sites, giving plasmid pHT315-f15. The correct construction of  
332 recombinant plasmids pHT315-f14 and pHT315-f15 was confirmed by sequencing, followed by  
333 electroporation into competent *B. cereus* ATCC 14579 cells, and selection and confirmation with  
334 colony PCR of an erythromycin-positive single colony.

335 Table 1. *B. cereus* strains and plasmids used in this study

| Strains                     | Plasmid Present (+)          | Description of Inserted Genes                                           | Sources or references |
|-----------------------------|------------------------------|-------------------------------------------------------------------------|-----------------------|
| <i>B. cereus</i> ATCC 14579 | wild type                    | No                                                                      | Lab stock             |
| strain 014                  | +pHT315-f14 Ery <sup>r</sup> | PEa- <i>spoVAEa</i> - <i>SGFP2</i>                                      | This study            |
| strain 015                  | +pHT315-f15 Ery <sup>r</sup> | PEa- <i>spoVAEa</i> - <i>SGFP2</i><br>and PD- <i>gerD-mScarlet-I</i>    | This study            |
| strain 006                  | +pHT315-f01 Ery <sup>r</sup> | PR- <i>gerR(A-C-B)</i> - <i>SGFP2</i>                                   | [7]                   |
| strain 007                  | +pHT315-f05 Ery <sup>r</sup> | PD- <i>gerD-mScarlet-I</i>                                              | [7]                   |
| strain 010                  | +pHT315-f10 Ery <sup>r</sup> | PD- <i>gerD</i> - <i>SGFP2</i>                                          | [7]                   |
| strain F06                  | +pHT315-f06 Ery <sup>r</sup> | PR- <i>gerR(A-C-B)</i> - <i>SGFP2</i><br>and PD- <i>gerD-mScarlet-I</i> | [7]                   |

336 Abbreviations: PEa, promoter of *spoVA* operon; PR, promoter of *gerR* operon; PD, promoter of *gerD*; Ery<sup>r</sup>, resistant to  
337 erythromycin.

## 338 **High frequency time-lapse image acquisition and analysis**

339 Dormant spores of *B. cereus* strain 014 were prepared and purified as described in previous work [20].  
340 A Nikon Eclipse Ti-E microscope (Nikon Instruments, Tokyo, Japan) equipped with a sCmos camera  
341 (Hamamatsu Flash 4.0 V2, Hamamatsu City, Japan) and wide-field fluorescence components was  
342 used to capture 100 frames of 14-bit *SGFP2* images (excitation at 488 nm and emission at 535 nm)  
343 with an exposure time of 50 ms for each frame and no delay interval. An individual spore located in

344 100 frames was selected, duplicated, and analyzed by the plugin Adrian's FWHM in ImageJ. The  
345 percent change of FWHM in the second frame to the hundredth frame relative to the FWHM in the  
346 first frame was calculated, and the graph was made by the software of GraphPad Prism version 9.3.

### 347 **Images of SpoVAEa-SGFP2 expressed in spores of *B. cereus* strains 014 and 015;** 348 **acquisition and analysis**

349 The preparation of *B. cereus* dormant spores and their visualization were carried out as described in  
350 our previous work [20]. Spores of *B. cereus* strain 014 expressing SpoVAEa-SGFP2 and spores of *B.*  
351 *cereus* strain 015 expressing SpoVAEa-SGFP2 and GerD-mScarlet-I were captured in the phase-  
352 contrast and SGFP2 (excitation at 470 nm and emission at 516 nm) channels using a Nikon Eclipse  
353 Ti-E microscope. Images were analyzed by the ObjectJ SporeAnalyzer\_1c.ojj in Fiji/ImageJ  
354 (<https://sils.fnwi.uva.nl/bcb/objectj/examples/SporeAnalyzer/MD/SporeAnalyzer.html>).

### 355 **Co-localization assays and data analysis**

356 Dormant spores of *B. cereus* strains 015 and 007 were prepared and purified as described in our  
357 previous work [20]. Spores of *B. cereus* strains 015 and 007 were captured in three channels: phase-  
358 contrast, SGFP2 (excitation at 470 nm and emission at 516 nm) and mScarlet-I (excitation at 555 nm  
359 and emission at 593 nm) using a Nikon Eclipse Ti-E microscope. All acquired images in the co-  
360 localization assay were processed with ImageJ. The SGFP2 and mScarlet-I images were used to  
361 calculate the co-localization indicator Pearson's coefficient by the plugin JACoP in ImageJ [22].

### 362 **Germination assays by time-lapse imaging and data processing**

363 Dormant spores of *B. cereus* strains F06, 006, 015, 014, 007 and wild-type spores were prepared and  
364 purified as described previously [20]. Microscope slides were prepared as described previously [29].  
365 Briefly, a 65  $\mu$ l size Gene frame with 0.25 mm thickness (Thermofisher Scientific, The Netherlands,  
366 Cat. No.: AB0577) was attached on the center of a normal microscope slide. A liquid mixture for an  
367 agarose pad was made with a 1:1 mixture of 2x germination buffer (see below) and 2% agarose in a  
368 heat block at 55°C. 60  $\mu$ l of the liquid mixture was pipetted on the area of frame, immediately pressed  
369 with another slide and placed at 4°C for at least 20 min to solidify.

370 Dormant spores suspended in ice-cold PBS (pH 7.4) were heat activated for 15 min at 70°C and  
371 washed three times with ice-cold PBS (pH 7.4) by centrifugation at 14,300  $\times$ g for 15 min at 4°C. The  
372 heat-treated spores were suspended in ice-cold germination buffer (50 mM Tris-HCl (pH 7.4), 10 mM  
373 NaCl and 100 mM L-alanine) at an OD600 of 15. The spore suspension (1.3  $\mu$ l) was dropped onto the  
374 solid agarose pad, immediately covered by a cover slide (18 $\times$ 18 mm) and was now ready for time-  
375 lapse microscopy.

376 A Nikon Eclipse Ti-E microscope (Nikon Instruments, Tokyo, Japan) equipped with an sCmos camera  
377 (Hamamatsu Flash 4.0 V2, Hamamatsu City, Japan), phase-contrast, and wide-field fluorescence

378 components was used to track germination of *B. cereus* spores for 4 hours with 10 min intervals.  
379 Spores of *B. cereus* strain F06 expressing GerR(A-C-B)-SGFP2 and GerD-mScarlet-I were captured  
380 by four images, phase-contrast, SGFP2 fluorescence (excitation at 470 nm and emission at 516 nm),  
381 mScarlet-I (excitation at 555 nm and emission at 593 nm) and FRET (excitation at 470 nm and  
382 emission at 593 nm). Spores of *B. cereus* strain 006 expressing GerR(A-C-B)-SGFP2 and spores of *B.*  
383 *cereus* strain 014 expressing SpoVAEa-SGFP2 were captured by phase-contrast and SGFP2 images.  
384 Spores of *B. cereus* 015 expressing SpoVAEa-SGFP2 and GerD-mScarlet-I were captured by phase-  
385 contrast, SGFP2 and mScarlet-I images. Spores of *B. cereus* 007 expressing GerD-mScarlet-I were  
386 captured by phase-contrast and mScarlet-I images.

387 All 16-bit type images taken in germination assays were converted to 32-bit type. Selection and  
388 measurement of the area of background in samples without an image were carried out, and  
389 background was subtracted by the tool of Process—Math—Subtract in Fiji/ImageJ. The germinated  
390 spores were analyzed and various intensities of individual spores measured using the ObjectJ  
391 SporeTrackerC\_1h.ojj in Fiji/ImageJ  
392 (<https://sils.fnwi.uva.nl/bcb/objectj/examples/sporetrackerc/MD/SporeTrackerC.html>).

## 393 Acknowledgments

394 We acknowledge the Van Leeuwenhoek Center for Advanced Microscopy (LCAM) at the University of  
395 Amsterdam for offering the microscopy platform. We would like to thank Ronald M. P. Breedijk for his  
396 help in microscopy. We appreciate Juan Wen for sharing the raw data on the high frequency time-  
397 lapse images of SpoVA-SGFP2 in one *B. subtilis* spore. Finally, Yan Wang acknowledges the China  
398 Scholarship Council for her PhD scholarship.

## 399 References

- 400 1. Ehling-Schulz, M.; Lereclus, D.; Koehler, T.M. The *Bacillus cereus* Group: *Bacillus* species with pathogenic  
401 potential. *Microbiol. Spectr.* **2019**, *7*, doi:10.1128/microbiolspec.GPP3-0032-2018.
- 402 2. Jessberger, N.; Dietrich, R.; Granum, P.E.; Märtlbauer, E. The *Bacillus cereus* food infection as  
403 multifactorial process. *Toxins (Basel)* **2020**, *12*, doi:10.3390/toxins12110701.
- 404 3. Jovanovic, J.; Ornelis, V.F.M.; Madder, A.; Rajkovic, A. *Bacillus cereus* food intoxication and toxicoinfection.  
405 *Compr. Rev. Food Sci. Food Saf.* **2021**, *20*, 3719–3761, doi:10.1111/1541-4337.12785.
- 406 4. McKenney, P.T.; Driks, A.; Eichenberger, P. The *Bacillus subtilis* endospore: assembly and functions of the  
407 multilayered coat. *Nat. Rev. Microbiol.* **2013**, *11*, 33–44, doi:10.1038/nrmicro2921.
- 408 5. Pelczar, P.L.; Setlow, P. Localization of the germination protein GerD to the inner membrane in *Bacillus*  
409 *subtilis* spores. *J. Bacteriol.* **2008**, *190*, 5635–5641, doi:10.1128/JB.00670-08.
- 410 6. Pelczar, P.L.; Igarashi, T.; Setlow, B.; Setlow, P. Role of GerD in germination of *Bacillus subtilis* spores. *J.*  
411 *Bacteriol.* **2007**, *189*, 1090–1098, doi:10.1128/JB.01606-06.
- 412 7. Wang, Y.; Breedijk, R.M.P.; Hink, M.A.; Bults, L.; Vischer, N.O.E.; Setlow, P.; Brul, S. Dynamics of  
413 germinosome formation and FRET-based analysis of interactions between GerD and germinant receptor  
414 subunits in *Bacillus cereus* spores. *Int. J. Mol. Sci.* **2021**, *22*, doi:10.3390/ijms222011230.

- 415 8. Fort, P.; Errington, J. Nucleotide sequence and complementation analysis of a polycistronic sporulation  
416 operon, *spoVA*, in *Bacillus subtilis*. *J. Gen. Microbiol.* **1985**, *131*, 1091–1105, doi:10.1099/00221287-131-5-  
417 1091.
- 418 9. Perez-Valdespino, A.; Li, Y.; Setlow, B.; Ghosh, S.; Pan, D.; Korza, G.; Feeherry, F.E.; Doona, C.J.; Li, Y.-  
419 Q.; Hao, B.; et al. Function of the SpoVAEa and SpoVAF proteins of *Bacillus subtilis* spores. *J. Bacteriol.*  
420 **2014**, *196*, 2077–2088, doi:10.1128/JB.01546-14.
- 421 10. Vepachedu, V.R.; Setlow, P. Analysis of interactions between nutrient germinant receptors and SpoVA  
422 proteins of *Bacillus subtilis* spores. *FEMS Microbiol. Lett.* **2007**, *274*, 42–47, doi:10.1111/j.1574-  
423 6968.2007.00807.x.
- 424 11. Wen, J.; Vischer, N.O.; de Vos, A.L.; Manders, E.M.M.; Setlow, P.; Brul, S. Organization and dynamics of  
425 the SpoVAEa protein, and its surrounding inner membrane lipids upon germination of *Bacillus subtilis*  
426 spores. *bioRxiv* **2021**, doi:10.1101/2021.11.20.469378.
- 427 12. Moir, A.; Cooper, G. Spore germination. *Microbiol. Spectr.* **2015**, *3*, doi:10.1128/microbiolspec.TBS-0014-  
428 2012.
- 429 13. Shen, A.; Edwards, A.N.; Sarker, M.R.; Paredes-Sabja, D. Sporulation and germination in Clostridial  
430 pathogens. *Microbiol. Spectr.* **2019**, *7*, doi:10.1128/microbiolspec.GPP3-0017-2018.
- 431 14. Christie, G.; Setlow, P. *Bacillus* spore germination: Knowns, unknowns and what we need to learn. *Cell.*  
432 *Signal.* **2020**, *74*, 109729, doi:10.1016/j.cellsig.2020.109729.
- 433 15. Swerdlow, B.M.; Setlow, B.; Setlow, P. Levels of H<sup>+</sup> and other monovalent cations in dormant and  
434 germinating spores of *Bacillus megaterium*. *J. Bacteriol.* **1981**, *148*, 20–29, doi:10.1128/jb.148.1.20-  
435 29.1981.
- 436 16. Li, Y.; Davis, A.; Korza, G.; Zhang, P.; Li, Y.-Q.; Setlow, B.; Setlow, P.; Hao, B. Role of a SpoVA protein in  
437 dipicolinic acid uptake into developing spores of *Bacillus subtilis*. *J. Bacteriol.* **2012**, *194*, 1875–1884,  
438 doi:10.1128/JB.00062-12.
- 439 17. Vary, J.C.; Halvorson, H.O. Kinetics of germination of *Bacillus* spores. *J. Bacteriol.* **1965**, *89*, 1340–1347,  
440 doi:10.1128/jb.89.5.1340-1347.1965.
- 441 18. Hashimoto, T.; Frieben, W.R.; Conti, S.F. Microgermination of *Bacillus cereus* spores. *J. Bacteriol.* **1969**,  
442 *100*, 1385–1392, doi:10.1128/jb.100.3.1385-1392.1969.
- 443 19. Kong, L.; Zhang, P.; Wang, G.; Yu, J.; Setlow, P.; Li, Y.-Q. Characterization of bacterial spore germination  
444 using phase-contrast and fluorescence microscopy, Raman spectroscopy and optical tweezers. *Nat. Protoc.*  
445 **2011**, *6*, 625–639, doi:10.1038/nprot.2011.307.
- 446 20. Wang, Y.; Boer, R. de; Vischer, N.; van Haastrecht, P.; Setlow, P.; Brul, S. Visualization of germination  
447 proteins in putative *Bacillus cereus* germinosomes. *Int. J. Mol. Sci.* **2020**, *21*, doi:10.3390/ijms21155198.
- 448 21. Hornstra, L.M.; Vries, Y.P. de; Vos, W.M. de; Abee, T.; Wells-Bennik, M.H.J. *gerR*, a novel *ger* operon  
449 involved in L-alanine- and inosine-initiated germination of *Bacillus cereus* ATCC 14579. *Appl. Environ.*  
450 *Microbiol.* **2005**, *71*, 774–781, doi:10.1128/AEM.71.2.774-781.2005.
- 451 22. Bolte, S.; Cordelières, F.P. A guided tour into subcellular colocalization analysis in light microscopy. *J.*  
452 *Microsc.* **2006**, *224*, 213–232, doi:10.1111/j.1365-2818.2006.01706.x.
- 453 23. Adler, J.; Parmryd, I. Quantifying colocalization by correlation: the Pearson correlation coefficient is superior  
454 to the Mander's overlap coefficient. *Cytometry A* **2010**, *77*, 733–742, doi:10.1002/cyto.a.20896.
- 455 24. Cabrera-Martinez, R.-M.; Tovar-Rojo, F.; Vepachedu, V.R.; Setlow, P. Effects of overexpression of nutrient  
456 receptors on germination of spores of *Bacillus subtilis*. *J. Bacteriol.* **2003**, *185*, 2457–2464,  
457 doi:10.1128/JB.185.8.2457-2464.2003.



- 458 25. Hornstra, L.M.; Vries, Y.P. de; Wells-Bennik, M.H.J.; Vos, W.M. de; Abee, T. Characterization of  
459 germination receptors of *Bacillus cereus* ATCC 14579. *Appl. Environ. Microbiol.* **2006**, *72*, 44–53,  
460 doi:10.1128/AEM.72.1.44-53.2006.
- 461 26. Zhang, J.; Griffiths, K.K.; Cowan, A.; Setlow, P.; Yu, J. Expression level of *Bacillus subtilis* germinant  
462 receptors determines the average rate but not the heterogeneity of spore germination. *J. Bacteriol.* **2013**,  
463 *195*, 1735–1740, doi:10.1128/JB.02212-12.
- 464 27. Artzi, L.; Alon, A.; Brock, K.P.; Green, A.G.; Tam, A.; Ramírez-Guadiana, F.H.; Marks, D.; Kruse, A.;  
465 Rudner, D.Z. Dormant spores sense amino acids through the B subunits of their germination receptors. *Nat.*  
466 *Commun.* **2021**, *12*, 6842, doi:10.1038/s41467-021-27235-2.
- 467 28. Blinker, S.; Vreede, J.; Setlow, P.; Brul, S. Predicting the structure and dynamics of membrane protein  
468 GerAB from *Bacillus subtilis*. *Int. J. Mol. Sci.* **2021**, *22*, doi:10.3390/ijms22073793.
- 469 29. Pandey, R.; Beek, A. ter; Vischer, N.O.E.; Smelt, J.P.P.M.; Brul, S.; Manders, E.M.M. Live cell imaging of  
470 germination and outgrowth of individual *Bacillus subtilis* spores; the effect of heat stress quantitatively  
471 analyzed with SporeTracker. *PLoS One* **2013**, *8*, e58972, doi:10.1371/journal.pone.0058972.
- 472
